# Supplementary material for: Lightweight Porous Glass Composite Materials Based on Capillary Suspensions
Source: MDPI journal article supplement (doi:10.3390/ma12040619), 2019-02-19
Supplement: s1 [file s1]

# Lightweight Porous Glass Composite Materials based on Capillary Suspensions

Katharina Hartung <sup>1</sup>, Carolyn Benner <sup>1</sup>, Norbert Willenbacher <sup>1</sup> and Erin Koos <sup>2,\*</sup>

<sup>1</sup> Karlsruhe Institute of Technology, Institute for Mechanical Process Engineering and Mechanics, Gotthard-Franz-Straße 3, 76131 Karlsruhe, Germany; katharina.hartung@kit.edu (K.H.); carolyn.benner@yahoo.de (C.B.); norbert.willenbacher@kit.edu (N.W.)

<sup>2</sup> Department of Chemical Engineering, KU Leuven, Celestijnenlaan 200f, 3001 Leuven, Belgium.

\* Correspondence: erin.koos@kuleuven.be

## Supporting Information

- SEM images of original particles
- Pore size distributions

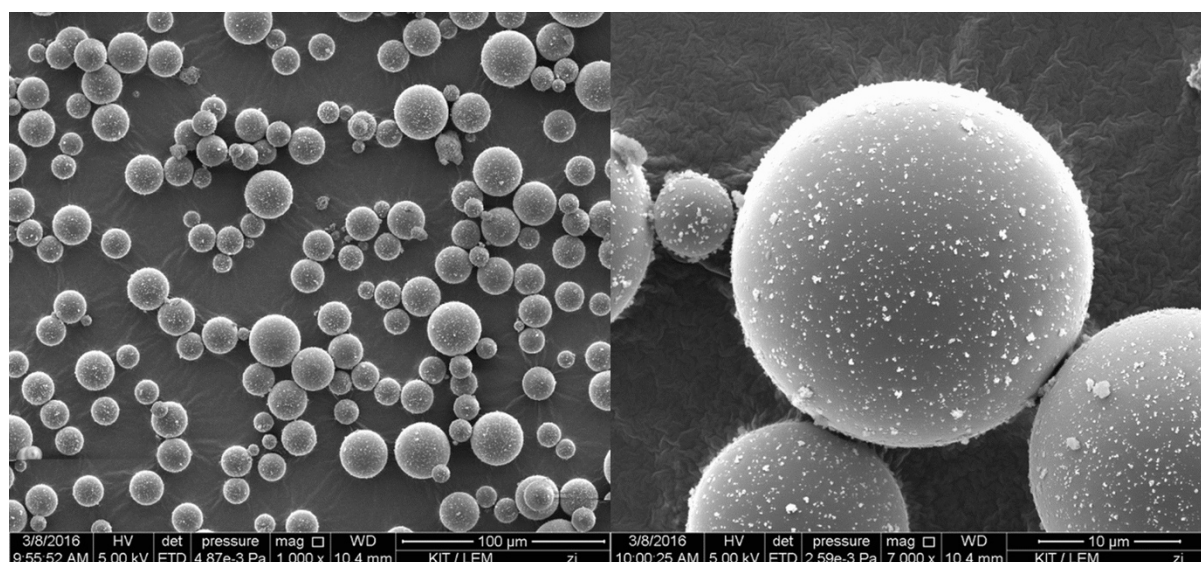

Figure S1. SEM image of the untreated particles

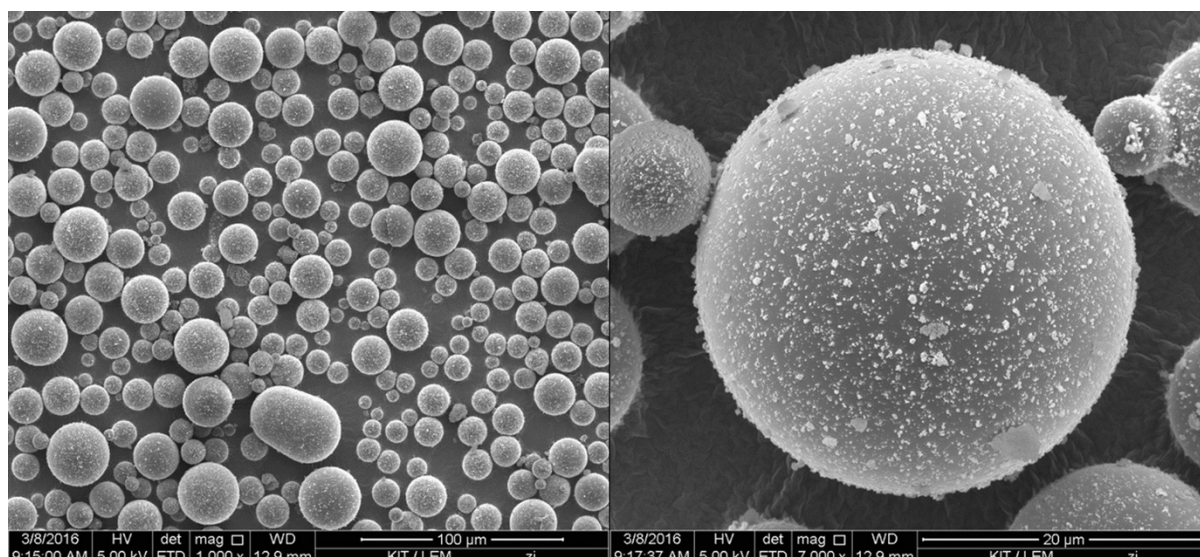

Figure S2. SEM image of the treated particles

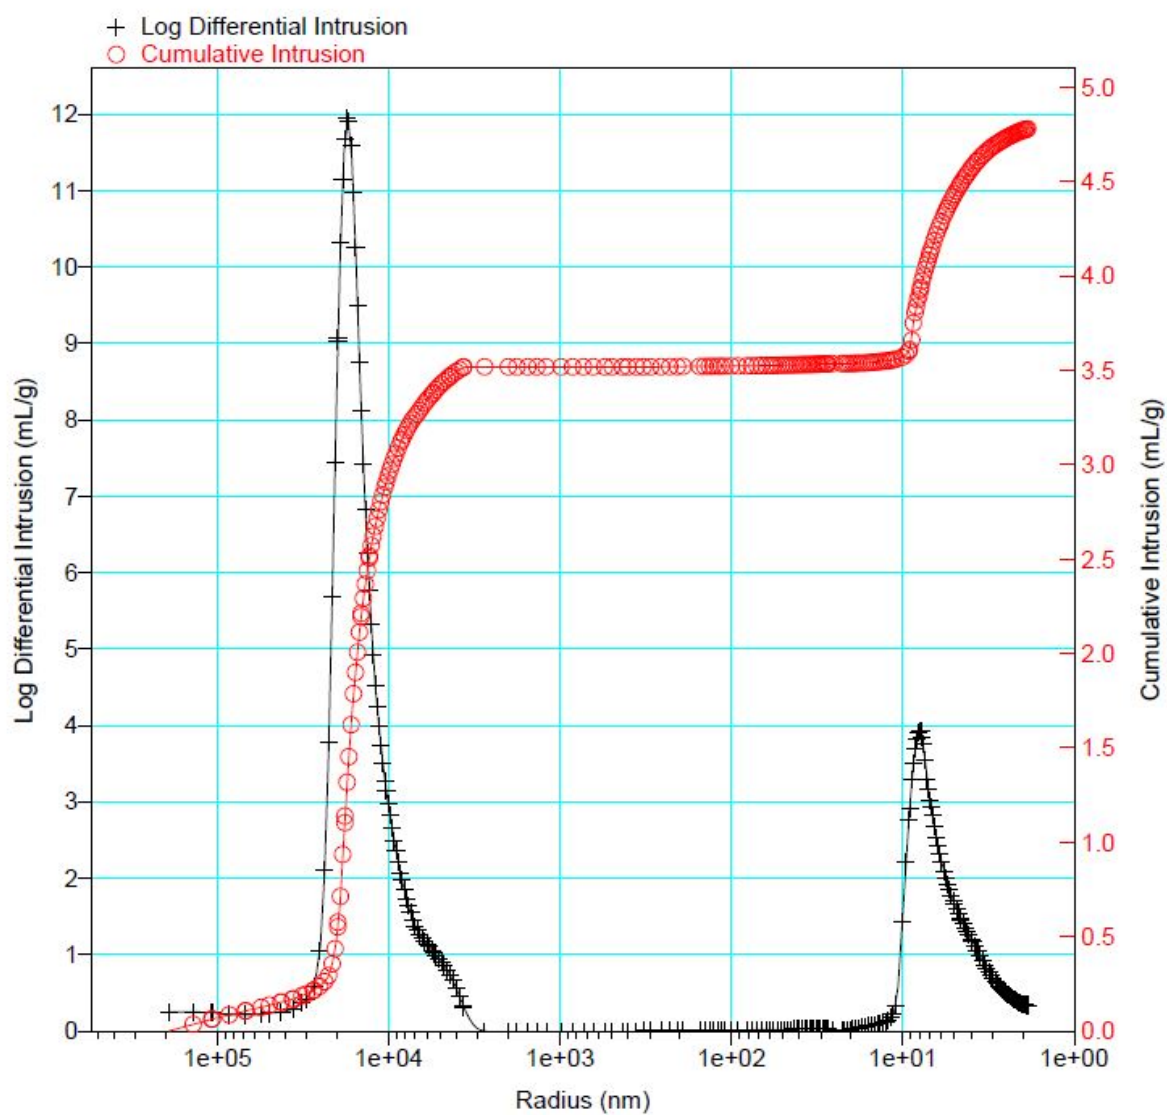

Figure S3. Pore size distribution of the untreated particles with 3% epoxy

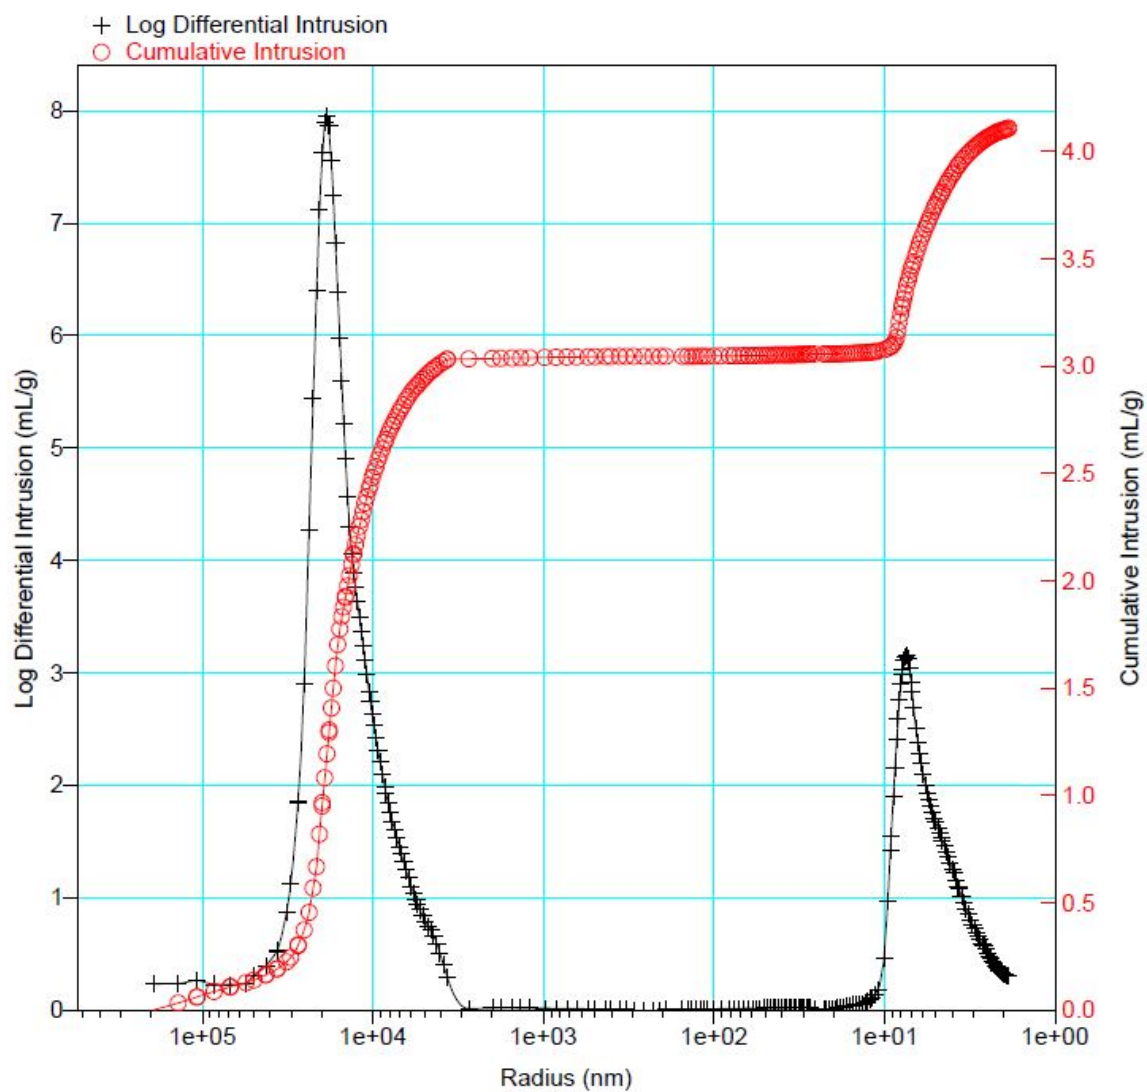

Figure S4. Pore size distribution of the untreated particles with 6% epoxy

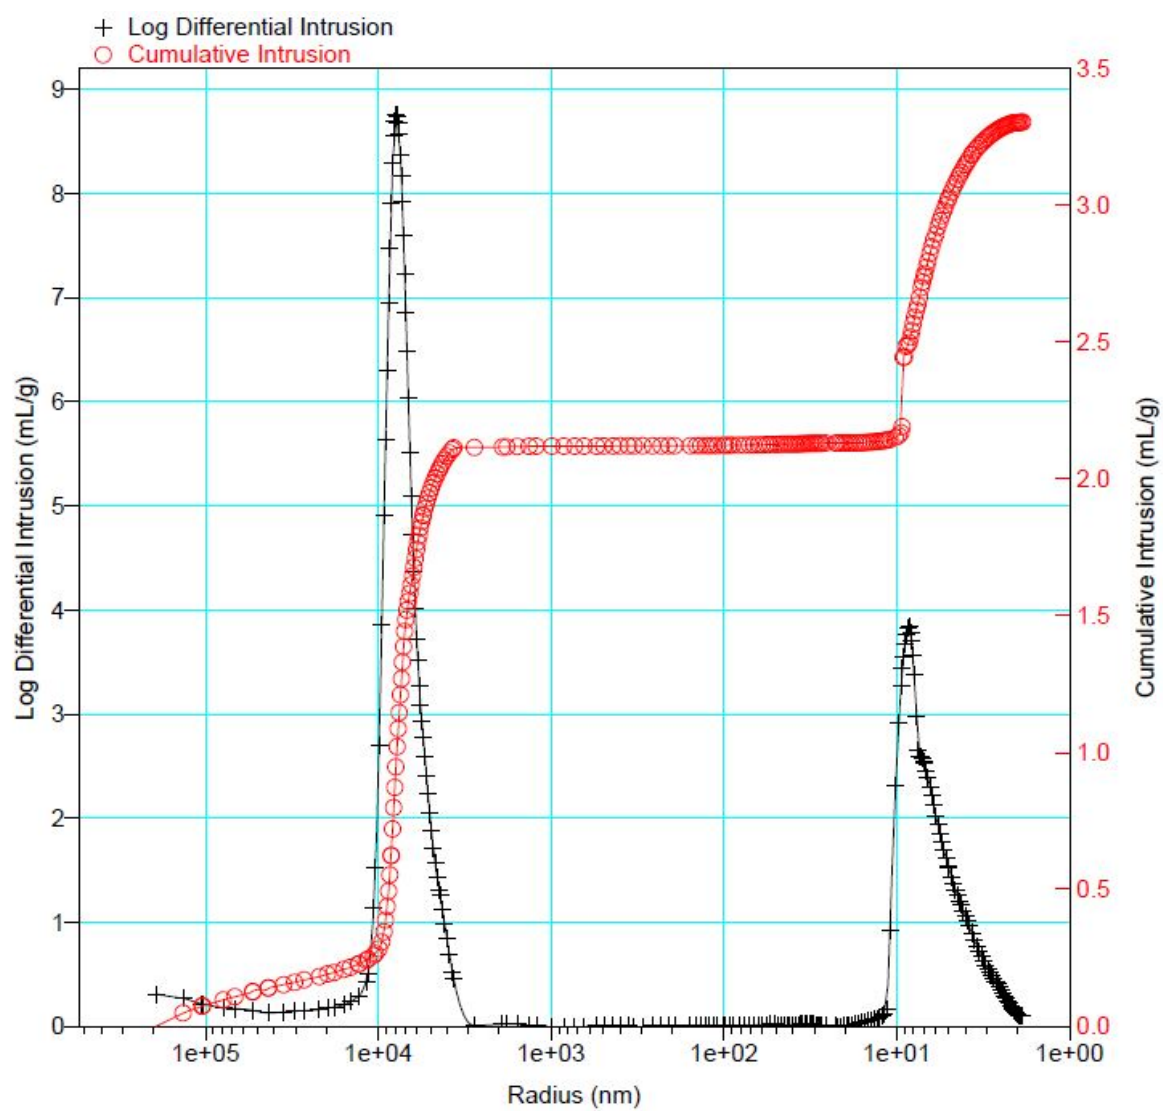

Figure S5. Pore size distribution of the treated particles with 3% epoxy

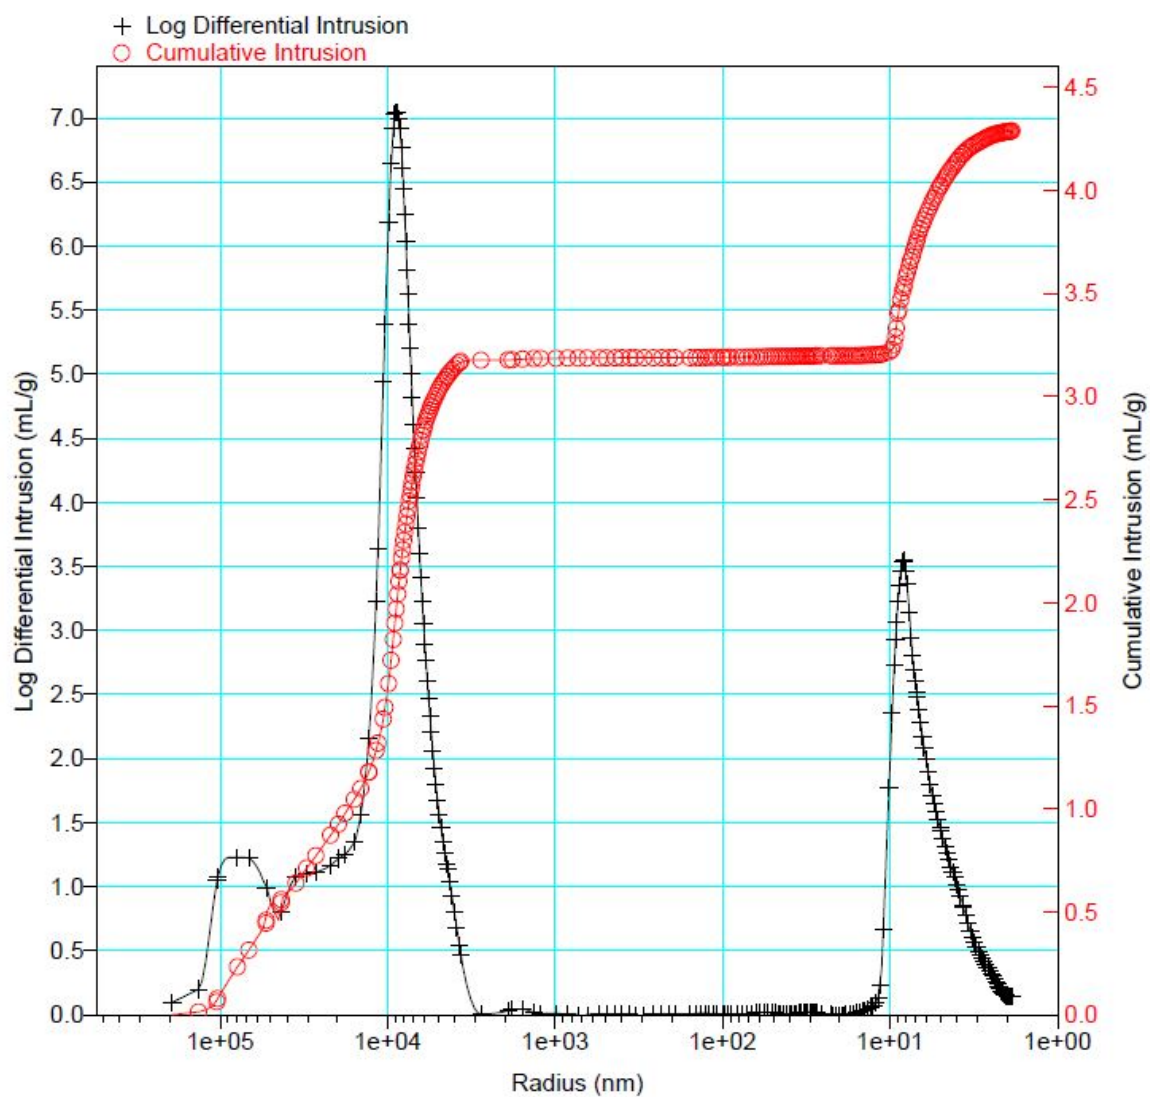

Figure S6. Pore size distribution of the treated particles with 6% epoxy
